# Supplementary material for: Notch controls the cell cycle to define leader versus follower identities during collective cell migration
Source: eLife. 2022 Apr 19;11:e73550. doi: 10.7554/eLife.73550 (PMC9129880; doi:10.7554/eLife.73550)
Supplement: Source data 1. [file elife-73550-data1.xlsx]

## Sheet: Figure 2D
	Percentage of embryos
	30% Epiboly	75% Epiboly	11hpf	12hpf
Absence NC	43	34	0	0
Reduced NC	42	35	20	0
Normal NC	15	31	80	100

## Sheet: Figure 3K
Number of chains	18hpf		20hpf		24hpf
	DMSO (%)	DAPT (%)	DMSO (%)	DAPT (%)	DMSO (%)	DAPT (%)
0	0	7.4
1	0	0
2	0	0
3	0	0
4	0	7.4
5	6.8	7.4
6	6.8	9.3	0	2.3
7	14	20	0	0
8	14	13	0	7
9	11	15	5.9	2.3
10	18	9.3	0	7
11	9.1	3.7	2	4.7
12	6.8	1.9	2	9.3
13	9.1	3.7	3.9	4.7
14	2.3	1.9	5.9	14		1.6
15	0	0	14	21		3.3
16	0	0	24	14		6.6
17	2.3	0	14	7		8.2
18			20	7	4.8	4.9
19			7.8		0	9.8
20			2		0	11
21					14	16
22					12	13
23					12	9.8
24					24	8.2
25					12	3.3
26					12	1.6
27					4.8	1.6
28					2.4
29					2.4
30

## Sheet: Figure 3L
Number of chains
Control	Notch Inhibition	Control	Notch Activation
8	5	6	3
8	7	7	5
8	7	7	6
9	7	7	6
9	7	7	6
9	7	7	7
9	7	7	7
9	7	7	7
9	7	7	7
9	7	7	7
10	7	7	7
10	7	7	8
10	7	7	8
10	7	8	8
10	8	8	8
10	8	8	8
10	8	8	8
10	8	8	8
10	8	8	8
10	8	8	8
10	8	8	8
10	8	8	9
10	8	8	9
10	8	8	9
11	8	8	9
11	8	8	9
11	8	8	9
11	8	9	9
11	8	9	9
11	8	9	9
11	8	9	9
11	8	9	9
11	8	9	9
11	8	9	9
11	8	9	9
11	8	9	9
11	8	9	9
11	8	9	10
11	8	9	10
11	8	9	10
11	9	9	10
11	9	9	10
11	9	9	10
11	9	9	10
11	9	9	10
11	9	9	10
11	9	9	10
11	9	9	10
12	9	9	10
12	9	9	10
12	9	9	10
12	9	9	10
12	9	9	10
12	9	9	10
12	9	9	11
12	9	9	11
12	9	9	11
12	9	9	11
12	9	9	11
12	9	9	11
12	9	9	11
12	9	9	11
12	9	9	11
12	9	9	11
12	9	9	11
12	9	9	11
12	9	9	11
12	9	10	11
12	9	10	11
12	9	10	11
12	9	10	11
12	9	10	11
12	9	10	11
12	9	10	11
12	9	10	11
13	9	10	11
13	9	10	11
13	9	10	11
13	9	10	11
13	9	10	11
13	9	10	12
13	9	10	12
13	9	10	12
13	9	10	12
13	9	10	12
13	9	10	12
13	9	10	12
13	9	10	12
13	9	10	12
13	9	10	12
13	9	10	12
13	9	10	12
13	9	10	12
13	10	10	12
14	10	10	12
14	10	10	12
14	10	10	12
14	10	10	12
14	10	10	12
14	10	10	12
14	10	10	12
14	10	10	13
14	10	10	13
14	10	10	13
14	10	10	13
14	10	10	13
14	10	10	13
14	10	10	13
14	10	10	13
14	10	10	13
14	10	10	13
14	10	10	13
14	10	10	13
14	10	10	13
14	10	10	13
15	10	10	13
15	10	10	13
15	10	11	14
15	10	11	14
15	10	11	14
15	10	11	14
15	10	11	14
15	10	11	14
15	10	11	14
15	10	11	14
15	10	11	14
15	10	11	14
15	10	11	14
15	10	11	14
15	10	11	14
15	10	11	14
15	10	11	15
16	10	11	15
16	10	11	15
16	10	11	15
17	10	11	15
17	10	11	15
	10	11	15
	10	11	15
	10	11	16
	11	11	16
	11	11	17
	11	11
	11	11
	11	11
	11	11
	11	11
	11	11
	11	11
	11	11
	11	11
	11	11
	11	11
	11	11
	11	11
	11	11
	11	11
	11	11
	11	11
	11	11
	11	11
	11	11
	11	11
	11	11
	11	11
	11	11
	11	11
	11	11
	11	11
	11	11
	11	11
	11	11
	11	12
	11	12
	11	12
	11	12
	11	12
	11	12
	11	12
	11	12
	12	12
	12	12
	12	12
	12	12
	12	12
	12	12
	12	12
	12	12
	12	12
	12	12
	12	12
	12	12
	12	12
	12	12
	12	12
	12	12
	12	12
	12	12
	12	12
	12	12
	12	12
	12	12
	13	12
	13	12
	13	12
	13	12
	13	12
	13	12
	13	12
	13	12
	13	12
	13	12
	13	12
	13	12
	13	12
	13	12
	14	12
	14	12
	15	12
	15	12
		12
		12
		12
		13
		13
		13
		13
		13
		13
		13
		13
		13
		13
		13
		13
		13
		13
		13
		13
		13
		13
		13
		13
		13
		13
		13
		13
		13
		13
		13
		13
		13
		13
		13
		13
		13
		13
		13
		13
		13
		13
		13
		13
		13
		13
		13
		13
		13
		14
		14
		14
		14
		14
		14
		14
		14
		14
		14
		14
		14
		14
		14
		14
		14
		14
		14
		14
		14
		14
		14
		14
		14
		14
		14
		14
		14
		14
		14
		14
		14
		14
		14
		14
		14
		14
		14
		14
		14
		14
		14
		14
		14
		14
		14
		14
		14
		14
		15
		15
		15
		15
		15
		15
		15
		15
		15
		15
		15
		15
		15
		15
		15
		15
		15
		15
		15
		15
		15
		15
		15
		15
		15
		15
		15
		15
		15
		16
		16
		16
		16
		16
		16
		16
		16
		16
		16
		16
		16
		16
		16
		16
		16
		16
		16
		16
		16
		17
		17
		17
		17
		17
		17
		17
		17
		17
		17
		17
		18
		18

## Sheet: Figure 5D
Cell speed (µm/h)
In vivo										In-silico
Control (DMSO)		Notch inhibition (CompE)		Control		Notch LOF		Notch GOF		1:2 control		1:3 control		All Followers		All Leaders
Leaders	Followers	Leaders	Followers	Leaders	Followers	Leaders	Followers	Leaders	Followers	Leaders	Followers	Leaders	Followers	Leaders	Followers	Leaders	Followers
19.2864	20.1481	19.0603	19.2204	21.4761	35.6246	21.6725	20.6199	20.2812	21.7138	22.7438	17.4682	22.0268	16.4457	20.1051	18.0592	20.6459	19.0563
19.0233	19.4557	18.8249	15.1467	20.2895	18.0489	15.4733	18.3753	9.40124	19.9173	24.0734	19.481	23.875	17.2905	21.0954	14.368	22.187	20.4649
22.6039	12.3056	23.2348	14.3695	24.0839	14.4212	28.4089	13.3385	19.4608	15.2398	20.6666	17.3955	23.4859	14.6784	16.9655	14.9812	27.1851	18.5725
18.6264	13.7828	22.771	16.7706	22.0529	19.0318	13.2797	20.3375	12.9707	17.1026	20.8949	18.804	23.7577	18.9835	20.443	15.7906	23.3424	19.4169
19.4326	13.8075	19.1516	18.8282	26.0492	25.242	19.4139	14.8852	37.3125	18.9476	20.3781	18.9341	23.9426	19.9759	19.4544	15.824	19.1619	17.495
20.0895	22.7318	24.8923	15.7595	31.4197	20.3895	12.7054	20.9703	21.3779	26.2767	24.2399	15.938	23.0264	16.0098	19.7993	16.6937	21.5166	19.9988
19.402	17.0049	15.4394	19.8014	24.5605	28.9828	11.8163	8.85998	21.5716	17.4447	24.8657	18.3347	23.0633	18.7407	19.7983	15.4923	24.0291	19.9413
18.8854	12.2676	24.8925	19.5458	19.8065	17.7949	11.8818	26.2398	31.6914	20.7537	19.8468	13.7768	25.8759	15.6142	23.1516	16.2791	21.3685	18.9119
26.0271	15.9748	17.738	27.7253	18.5312	16.3538	22.9161	17.8825	28.5223	19.4615	24.8184	19.6694	22.2645	20.3353	18.9128	15.6398	21.7846	16.4666
22.5669	16.7177	26.0082	19.8228	21.3133	28.3239	16.1914	9.92411	23.7273	28.0151	22.9027	14.9009	22.2028	17.9897	19.09	18.5192	23.3387	22.0057
19.4525	19.365	21.0139	17.9964	21.7328	13.071		25.0789	26.3761	19.2519	26.5325	18.2923	22.0403	18.725	20.1143	16.0084	21.4107	18.5844
18.1178	13.3003	19.0836	24.4564		24.2636		13.6498	18.3557	16.6493	22.678	15.6466	22.1788	18.9761	18.1771	16.6247	19.3404	22.9566
25.0435	17.2198	20.5565	37.7121		22.4024		15.8878	39.0504	17.0183	24.5436	20.9835	22.9399	16.8968	20.8496	12.6902	22.4141	20.2911
23.683	10.4016	19.445	18.0257		20.646		13.6362	23.2699	34.1199	22.6807	19.6418	23.7027	16.9297	21.3121	15.4824	19.4208	17.7719
15.3266	12.2693	14.9116	22.9228		19.2449		17.5763	29.2813	27.9921	20.4477	19.0214	19.7684	20.6856	18.3474	13.6316	20.1414	13.8896
21.7458	13.9793	13.8513	20.8663		29.9649		15.6765	19.1239	18.683	22.7034	19.3562	20.883	17.3242	19.6306	15.3211	23.2633	17.4484
17.6108	19.1877	17.4381	16.7352		20.7976		27.3077	21.4039	29.093	22.5575	16.7074	23.2979	19.4922	20.5071	14.2988	22.5041	21.5611
32.2889	20.3594	16.1248	12.6613		21.4941		24.8965	23.0976	10.2872	22.1095	19.7761	21.2646	21.8005	19.7511	18.2241	20.7277	19.1868
20.138	23.4693	13.0488	22.7917		17.6138		8.70124	22.6781	13.938	21.0444	19.1015	22.6206	19.6507	18.1183	14.7268	19.7831	16.8494
21.6828	17.934	16.9515	19.3783		9.4957		14.8952	15.3722	20.4548	22.2715	16.3513	23.273	18.4689	19.98	15.5385	22.5973	22.7808
18.4831	19.7578	15.9593	24.1879		14.8986			34.0306	17.2898	23.2911	21.3056	21.7423	17.6801	19.6786	13.4442	21.1203	19.3435
28.8101	23.1514	10.745	15.7959		28.2272			26.2721	37.7538	23.0757	16.1928	21.8991	18.6211	21.2474	14.1285	23.328	17.9056
	14.8568	16.4989	21.8557		9.6344			22.0629	29.0764	20.9893	17.1323	22.5742	19.1079	18.5662	13.3767	22.0035	20.5725
	11.9967	14.6959	30.9145		12.7233				26.288	23.5587	15.7028	23.9033	15.5738	20.3139	16.6076	23.956	19.2512
	13.9395	11.6432	25.3743		18.0986				20.3441	22.9919	20.3305	23.122	13.18	18.1188	13.7804	23.3519	13.9354
	19.0505	20.2308	21.6132		21.7738				21.6619	23.7307	18.6817	24.4688	19.614	21.7117	11.7868	22.7413	20.6844
	27.9288	12.9826	21.6934		14.9779				19.3251	23.6361	19.1032	21.6477	20.2312	19.9393	15.0941	20.0724	17.7899
	15.1945	14.1376	28.5652		12.7251				19.3904	20.9688	20.0252	23.637	16.1244	18.909	15.707	22.0707	18.5226
	18.7541	14.1881	24.2392		17.7115				23.1364	24.826	17.1393	22.7344	17.6545	19.8909	17.0423	23.9354	20.1866
	25.4254	13.777	23.0344		19.7301				19.5897	23.4027	15.7309	21.4699	17.4855	21.9275	14.0117	22.597	17.3538
	18.6934	18.5245	20.8661		21.614				31.4018	22.5892	18.5364	23.04	16.5422	21.0012	14.4327	22.3928	20.597
	18.1776	17.2987	22.7787		26.9687				11.7668	25.3437	15.4279	23.9235	16.0337	18.1136	18.0694	22.5163	17.0879
	14.4005	19.7614	23.0903		19.0539				20.759	24.3019	16.5157	21.1998	13.1365	20.4685	17.6991	23.7763	18.0693
	16.3795	15.2398	24.0286		22.5369				17.1474	22.7526	21.5293	24.3126	15.7779	20.2744	17.7907	26.2509	17.8284
	11.7616	14.5877	15.5305		14.7821				28.2683	22.5828	21.078	24.086	20.5659	20.4736	16.0447	22.8041	21.6435
	21.7353	23.7478	14.923		35.1991				19.1758	22.6122	14.8596	22.3967	16.5987	20.7203	16.1364	21.5885	20.5152
	13.7998	16.5305	18.9325		21.3817				19.1057	22.0533	20.7706	22.3629	17.612	17.9875	14.0049	22.0155	19.6657
	21.0476	16.4534	12.3429		24.823				28.8828	23.6054	19.1464	20.824	14.5912	19.9714	12.1088	22.7366	18.4269
	16.8554	18.8656	16.7789		14.4843				19.6702	21.2885	22.2174	22.1783	18.4206	19.3278	18.2854	22.6085	20.1554
	19.7452	17.3877	18.9438		15.5276				27.8167	23.83	16.5189	22.5253	20.5948	20.0385	16.3564	25.8437	17.892
	17.6296	16.0652	13.2896		38.09				30.7495	26.0608	16.6875	21.6607	19.6788	21.0736	14.9375	23.0212	21.9337
	20.6115	15.1307	21.2423		20.1643				24.9809	21.2799	15.6302	22.2324	15.197	19.5917	15.1574	22.438	18.0035
	23.2488		22.2955		14.0474				14.9008	20.0946	20.3935	23.9824	22.3556	22.7722	12.8273	24.0233	17.1506
	31.0367		18.7763		19.3026				24.7762	23.8664	15.1814	21.8838	16.998	18.2756	12.5385	24.2523	17.5373
	25.0098		21.3795		6.69261				19.0771	24.3508	20.0102	22.0831	20.6235	22.313	16.4069	23.8657	16.5482
	16.858		22.9304		31.4202				31.6362	22.0332	18.2379	21.8095	15.9174	18.1379	14.2334	21.4129	18.5873
	16.5421		23.1099		15.3859				23.1084	26.8088	15.6941	22.356	16.5332	20.1488	14.0257	25.753	19.1337
	22.896		20.0723		12.856				19.1934	22.722	22.9476	24.9689	22.0721	20.6511	15.6927	27.1902	20.4268
	11.9885		19.9863		19.3326				24.057	23.4812	21.4986	23.161	21.1102	21.0647	14.5389	22.0279	20.0981
	18.4626		15.0317		33.4072				9.43145	22.7275	17.4161	24.7704	17.5616	20.1985	15.766	20.2643	18.8188
			14.0767		7.3938				26.7435	23.4879	18.4454	22.2915	16.8035	17.4241	12.9551	20.8062	21.3531
			21.3809		17.9123				19.7374	22.605	16.6294	20.6573	18.9085	20.313	13.5997	21.2358	18.0731
			20.8096		11.7758				14.7846	24.0012	17.4108	22.4836	16.8207	17.2398	17.515	23.217	18.6617
			25.6555		25.7471				16.2111	22.1506	17.4012	23.0693	21.0229	22.5811	15.9668	21.9623	17.0043
			20.6478		14.0595				27.0378	18.755	19.4627	23.8372	18.914	20.1859	19.1161	23.6138	21.1141
			19.1404						21.8777	21.2726	15.9513	20.3727	22.1885	19.6624	15.7948	21.7802	19.1497
			28.483						30.3265	21.9671	21.3448	25.0233	16.566	19.9447	19.3831	22.5382	16.4548
			23.6575						26.5325	23.9755	21.9787	21.0014	14.5399	19.7138	17.2945	22.5034	18.4913
			23.3887						38.0552	23.3866	20.0237	24.9599	17.8799	18.8119	16.9977	22.0795	17.5842
			13.7185						20.2172	23.0413	18.4057	23.4557	15.7382	17.7121	11.9636	23.9493	19.7715
			28.1213						19.5992	22.1652	19.9851	22.991	15.7762	20.6043	11.4474	22.1221	19.1398
			14.134						23.6929	22.1344	17.6309	23.107	20.4058	19.4352	16.2702	23.0355	16.1826
			27.2959						22.99	20.4673	16.6501	19.8864	17.8416	16.9887	16.3334	21.4318	15.8122
			26.9907						20.6226	23.2564	20.4369	22.8951	20.2365	18.9997	15.3752	20.4657	19.638
			21.7223						25.3255	22.8966	14.6344	24.6734	13.3789	18.7134	16.3809	22.3077	16.8697
			20.1939						22.3401	22.1356	17.1447	24.3253	16.3615	19.7382	16.5359	21.232	21.9036
			22.4293						15.3162	20.1092	20.0806	21.8066	20.3706	14.0471	15.3131	22.2112	16.3581
			15.0807						23.9406	23.1666	20.9579	22.4819	19.3819	19.358	14.2602	20.6745	16.0001
			21.2846						26.8358	24.0263	18.8179	22.2235	19.3913	17.9884	17.0788	23.7071	19.7045
			19.2233						19.1331	23.8867	18.7094	22.4978	17.2789	20.5655	13.2661	20.4835	19.6277
			14.2771						20.0036	22.7053	16.3888	21.9382	16.8068	18.9717	12.6618	21.0382	19.404
			23.3826						19.8944	22.4991	17.0244	22.0129	22.1737	18.9955	11.6866	25.2266	18.5124
			22.0182						14.6369	22.5929	19.8003	23.1711	20.2158	20.8038	16.3087	24.1691	17.4675
			13.964						24.7294	22.5229	18.6206	23.6836	16.2309	20.9519	14.7807	22.8332	16.5759
			14.4445						26.2066	23.7458	23.6179	20.9719	19.212	20.4692	15.517	22.5088	21.3655
			16.403						21.5042	20.8308	23.548	26.1628	21.1934	21.3611	15.0298	22.5218	19.5533
			24.0611						15.6482	21.2418	15.0181	23.3081	18.4747	17.4609	15.7465	24.1124	18.2743
			15.2343						22.5874	21.9314	15.6128	21.0646	18.5936	19.6915	15.0972	22.9061	15.5453
			20.414						34.5707	21.5918	18.6942	21.113	17.2707	19.7488	17.3974	21.3473	20.8495
			21.814						20.1341	27.181	17.9546	22.3627	20.7784	19.0834	17.1157	21.4753	18.2554
			15.6215						29.2356	22.8465	20.6297	20.8039	22.9103	18.556	14.0589	21.7196	18.3229
			17.8693						16.9328	22.0915	16.844	21.7877	19.1036	17.4338	17.7295	20.677	17.3718
			11.72						28.2186	21.4269	18.5202	20.917	18.6833	20.371	14.8262	22.5161	20.5518
			20.6136						27.5617	24.7442	17.223	21.7145	15.6844	21.2148	18.1234	21.0496	21.4734
			16.9339						28.4007	21.1545	17.8031	22.9601	20.5288	20.7438	14.1482	24.1987	21.7643
			20.3599						17.7266	22.6649	17.2662	23.7326	21.0109	20.4709	15.3581	21.1479	17.4495
			29.2663						22.3565	22.5494	18.2154	24.3799	14.958	20.5671	14.3387	22.4051	23.4655
			11.8735						19.538	21.5507	13.5187	24.2959	15.716	20.1905	15.9575	23.988	19.5878
			15.0152						29.0407	21.5841	16.0124	22.047	19.0644	19.0813	10.9652	21.8615	16.5709
			15.9429						15.5755	23.6649	21.2726	23.4798	14.7188	19.2503	15.5654	25.5401	22.7122
			16.4028						16.7579	23.4399	21.0518	23.2178	20.9178	19.2946	17.4411	25.8058	19.3848
			20.6975						23.599	23.3334	20.7474	20.9758	14.8154	21.4942	17.5502	18.8008	19.5061
			10.5463						23.0214	22.499	19.12	23.0703	18.8763	18.5151	16.1555	22.9325	18.2873
			18.7166						18.6024	20.8168	16.7738	23.4889	17.9919	18.8989	16.9817	23.5831	17.1651
			17.3072						21.7548	22.8555	17.5852	22.3158	15.9738	18.4236	13.7399	22.4259	19.5316
			15.6463						26.5144	23.8176	19.4018	23.317	14.4899	18.0127	17.7547	19.9431	18.4482
			11.5371						36.1762	21.958	19.334	21.6785	15.7453	17.6678	14.8625	22.3405	18.2028
			16.111						33.8848	24.6542	22.235	23.2503	15.4025	21.7044	15.952	26.2809	18.291
			14.3019						20.9245	23.756	20.6312	22.0579	18.9103	23.0258	17.3183	21.2558	19.3392
			19.0952						15.9126	22.0364	15.5757	23.083	20.7444	16.8532	14.0929	22.2465	18.3736
			12.105						26.7006		19.5496		17.8458		15.5089		20.0064
			10.5853						22.7363		16.166		20.323		15.4		22.2425
			28.5492						25.2245		15.7807		18.2794		13.81		18.062
			12.883						22.0018		19.6919		18.96		11.3629		16.2832
			14.5178						26.5399		20.6089		21.3337		17.0935		19.8134
			15.4639						34.5296		19.2257		18.4731		15.2798		17.0233
			18.7029						23.6292		19.5216		17.7617		14.4258		16.3413
			19.0272						20.3331		14.7645		17.2703		18.5283		17.8979
			15.3855						24.1561		13.8847		16.8702		16.9134		20.2611
			18.1775						20.5119		20.0736		17.9831		12.4392		17.9121
			14.7173						39.5269		17.0469		21.0596		15.1491		21.1688
			15.1782								17.4319		19.0192		17.6934		19.489
			22.3368								15.4562		17.1745		16.4704		21.8091
			30.6883								20.6038		18.4659		16.0175		18.4347
			26.0205								18.6738		15.5689		14.4861		21.8938
			12.4817								18.0776		20.0056		18.3157		20.4319
			22.1691								19.5821		12.5382		12.7578		19.7663
			19.5076								15.4542		20.3432		15.8113		18.3758
			36.8268								17.7325		12.3715		16.2276		15.0666
			18.1594								16.7161		16.5676		20.3649		21.84
			19.9609								18.86		17.7022		15.036		17.6075
			25.0102								19.1682		18.1446		17.6343		18.8362
			35.5007								20.7607		21.7766		15.614		18.1834
			18.3842								19.5959		18.0809		14.9078		19.178
			13.665								19.4945		17.144		14.3262		19.851
			12.9331								15.5634		11.2896		16.4892		18.0486
			14.5389								16.6507		17.4366		16.5071		21.9245
			29.3277								15.7009		16.6955		15.8582		15.0357
			13.0687								19.678		13.0018		17.2848		22.1524
			27.3714								17.2758		21.3996		15.5585		18.3302
			12.8603								20.8288		15.8847		15.6221		18.5044
			19.1251								17.3006		19.3847		14.992		17.3894
			13.6642								17.1973		15.7449		17.88		20.0313
			17.155								14.6164		11.2268		20.2337		21.2671
			17.6181								18.3488		14.4206		16.2029		20.6222
			12.3904								16.6218		21.2479		14.9459		19.7996
			19.598								19.7968		14.3083		14.9356		17.4471
			15.1623								18.3772		20.9405		17.8715		20.2317
			12.8424								19.9059		17.7575		15.5282		18.3703
			16.0289								15.1608		12.496		15.0913		19.3016
			16.7394								20.2292		15.8612		19.0614		19.5278
			13.059								15.8526		17.805		16.8554		16.4746
			14.7352								14.9734		17.6373		14.4516		19.8393
			15.4974								15.915		13.3491		13.8311		18.3237
			13.3515								22.3911		15.2819		14.8107		17.7207
			14.4651								21.2075		16.818		14.1625		25.0393
			17.212								16.7181		17.0593		17.8089		16.3214
			25.9437								21.0037		19.2852		18.2187		20.4122
			18.6026								15.1328		17.6202		14.8427		15.4681
			20.1969								16.8083		19.1532		18.1278		17.5337
			26.3658								16.4299		13.591		18.5708		19.5897
			15.0655								19.6956		9.45436		20.1065		20.8199
			18.8583								17.0074		14.7379		17.4256		21.2592
			18.5673								18.5232		20.0354		17.8703		19.9062
			22.425								20.223		17.5258		15.5744		17.1263
			14.277								20.3417		17.8269		15.0941		18.0886
			12.7161								17.6915		19.2351		12.1524		16.4296
			16.9962								19.7591		13.9854		15.7653		22.8347
			20.6643								13.8759		15.0553		17.9501		16.9972
			21.595								15.9974		20.6452		20.5792		19.1125
			20.8343								16.1337		19.6938		16.5622		16.5394
			17.7758								17.3284		17.9126		15.8615		15.2563
			9.60969								19.6213		17.0551		17.3306		16.8866
			14.5954								16.1643		20.6865		15.1736		18.3554
			13.5471								20.4753		18.3877		14.5834		20.2283
			24.9162								19.8108		18.1719		18.2948		19.5305
			11.5486								17.6408		15.1366		13.3689		18.3239
			12.2798								17.0377		19.6587		13.7857		17.623
			26.4259								17.462		17.6578		16.3055		21.4577
			14.9886								20.6381		16.6889		13.2322		25.9725
			16.6936								20.7526		16.753		12.3954		20.0085
			30.8488								21.297		15.9478		18.94		20.4215
			21.7449								22.5207		17.0665		17.3823		21.6469
			18.7956								19.3622		19.1822		18.2326		16.8322
			18.404								19.1119		20.3962		15.2111		18.7403
			21.2278								13.6508		16.6273		13.8685		22.4835
			19.9847								22.8581		19.0254		19.2287		23.1689
			15.3965								15.4659		20.7548		18.4334		15.2779
			19.1569								17.9924		18.8587		17.1417		18.879
			16.4783								18.5095		14.693		15.5121		19.7734
			18.6451								19.3132		16.0507		17.5071		15.8086
			16.8626								19.8647		16.0203		12.4319		15.6757
			32.8865								19.593		20.6118		15.5739		18.3197
			20.9417								16.5874		16.7673		17.8747		21.6911
			30.5193								22.4839		13.9014		18.1707		19.8472
			11.2517								14.3882		20.5037		15.1809		22.2172
			17.0915								19.8923		19.8318		15.6141		17.1058
			11.7023								21.7915		16.5535		14.6314		18.9535
			15.5306								17.7748		17.2756		20.7151		19.263
			19.0057								19.0562		16.4763		12.3094		21.5861
			20.58								18.7082		18.8948		15.5767		17.729
			16.2971								19.5164		16.7345		13.2429		21.33
			12.1474								21.324		20.7991		17.2615		20.3038
			25.2438								21.2373		15.851		13.08		17.4252
			12.136								16.3682		18.8546		14.8034		17.2634
			10.4679								15.408		18.6103		15.1611		20.5034
			18.0306								17.0625		15.7826		14.8309		21.275
			15.0751								19.5535		16.3285		13.4102		22.2426
			11.3215								13.877		18.3488		16.7573		21.2533
			11.1208								20.4747		15.3445		14.3515		16.9853
			9.5725								16.3756		22.6907		16.4312		17.575
			15.8297								18.1599		20.7507		14.3716		18.1844
											18.8893		20.82		19.1199		17.2832
											18.4572		19.0822		13.5009		18.6989
											21.2812		17.126		17.4431		16.1157
											16.9862		14.2173		15.9962		19.1724
											17.5081		18.5971		15.2942		21.208
											17.5425		15.8012		17.5876		20.1126
											16.9167		14.5913		18.7595		19.0707
											21.3571		18.8883		19.0269		17.2198
											15.1349		16.0426		16.1423		19.1796
											15.8163		18.5153		13.1491		18.9351
											22.6208		17.2418		17.7256		16.5325
											22.5356		17.3558		15.6249		21.5781
											19.3714		17.2904		18.8032		21.8433
											21.7876		15.7488		15.2351		16.1298
											16.6884		20.6712		16.9955		20.3683
											19.4893		18.8132		15.032		16.5646
											20.23		19.4668		16.5924		17.8391
											20.6878		18.9884		13.039		21.2808
											13.5755		15.7394		11.9458		23.2065
											17.4325		17.3909		20.7645		20.4972
											19.141		21.6637		16.7763		19.6667
											17.0401		19.0157		15.0891		20.8634
											13.6604		16.8087		15.3472		19.4673
											16.8516		18.5963		13.563		18.2724
											18.9877		17.0345		13.6754		17.2742
											20.5231		18.1531		12.7274		20.2299
											15.4851		21.5307		15.5205		16.8273
											17.27		14.0399		14.6792		18.4045
											17.0568		13.047		15.9572		16.4221
											20.6095		21.8792		21.9217		20.1092
											18.8601		17.427		15.8477		22.51
											19.7148		18.8503		15.8669		19.4019
											17.3743		18.3839		12.6749		20.7353
											17.0681		20.517		16.2913		18.8764
											18.4734		14.2318		11.2253		21.2188
											17.3001		22.4126		15.5339		24.3369
											22.1444		17.1704		12.7891		19.3324
											20.8758		19.0517		15.1329		19.8065
											19.8469		21.9081		16.3938		19.1032
											20.243		16.7767		13.932		18.3209
											14.7417		16.6659		16.5111		20.348
											17.7011		18.2494		14.3018		21.1813
											17.9392		14.8864		15.1448		18.9978
											19.6314		20.6913		14.1278		18.4004
											17.8701		19.3112		15.8876		16.9691
											17.2032		18.0194		18.3816		17.6395
											20.2252		18.8864		13.7425		23.1314
											14.3823		17.1629		15.1334		18.056
											18.1828		19.8299		14.6225		20.5818
											14.5667		18.3447		12.709		17.7656
											16.8247		15.3443		13.4747		18.8301
											19.5653		18.3487		16.5398		19.3032
											23.1144		16.3947		15.5239		18.1316
											18.823		20.2447		15.3891		17.3639
											19.4089		19.6117		10.2433		22.5752
											16.8027		16.0403		13.1682		18.3216
											18.6219		16.7043		16.5124		18.7684
											17.3696		15.568		12.9827		19.664
											19.8697		19.6656		20.0238		21.7101
											16.2573		16.04		14.7205		19.329
											17.9147		17.4615		14.4771		18.9009
											19.1611		18.1631		18.5897		15.0162
											17.8924		16.103		16.7247		16.7981
											16.1699		17.2592		14.8917		16.1056
											12.9761		16.5886		15.4301		19.9744
											19.7121		19.6532		14.2864		16.8259
											19.8438		17.3761		15.8175		18.9242
											20.3293		18.1789		14.9979		19.5748
											16.6814		15.1885		15.5989		25.9582
											16.3607		20.7762		16.096		16.4832
											19.3932		18.7597		17.5455		20.0726
											21.9719		18.0708		16.1688		23.3868
											14.7913		17.482		17.5905		22.8302
											14.8468		22.0896		17.849		18.276
											21.4277		13.6351		15.6279		18.0881
											15.9672		17.0484		14.2719		19.2862
											19.6044		17.3552		15.6278		20.413
											18.5571		17.0986		15.5019		20.8747
											19.6199		17.8534		17.3548		20.5036
											16.1395		12.6901		19.4308		19.1589
											21.0861		18.7352		14.5408		19.4634
											15.0966		14.9647		17.7413		17.5031
											17.8257		18.6051		15.5747		16.0266
											19.3705		16.0849		14.6701		22.2037
											20.7681		17.7541		15.2819		15.4326
											16.3526		18.0177		13.2879		18.812
											18.8418		19.4801		14.7587		18.7244
											17.6036		16.7984		18.7702		18.1097
											17.6941		17.4549		16.2031		26.4485
											17.4764		12.7838		14.2145		18.1036
											14.9869		18.4949		17.9555		17.291
											14.5511		20.2284		12.6553		19.8145
											20.141		15.5424		14.2064		15.8795
											17.2196		21.3197		15.2838		16.4598
											17.5519		16.8742		15.4455		17.1959
											17.4241		17.4635		14.1579		21.8552
											21.3161		16.2286		15.6754		20.683
											18.0706		18.4651		13.0257		18.1864
											17.827		16.7141		15.5878		22.3796
											11.8518		19.7063		17.1517		19.112
											19.3179		21.2807		15.8815		18.418
											18.8445		16.3555		16.5319		20.7905
											16.7547		15.762		15.6923		18.8463
											16.2773		16.1942		15.8658		17.6706
											20.725		19.0174		15.8246		21.8181
											18.536		15.6396		13.8473		16.4355
											19.1669		18.0015		16.2722		19.6749
											14.2808		15.9029		16.8692		16.5689
											14.5398		19.2496		19.7884		18.4767
											18.5424		22.0923		17.9657		20.8063
											17.7991		18.6769		16.5109		19.7348
											16.7989		20.4105		13.4879		19.7548
											13.5794		20.0002		14.667		16.0886
											19.4082		20.7213		12.9716		16.9913
											19.0854		16.233		18.7255		14.7659
											12.1515		19.0045		16.0961		21.5578
											17.7601		17.0712		15.5437		19.7982
											19.197		17.8145		18.1136		19.9095
											20.7174		18.6164		14.6436		24.6546
											19.2756		15.0148		15.79		18.1163
											14.6609		20.1745		17.8349		16.7488
											20.7678		17.2591		16.2325		17.1898
											18.381		17.0245		17.5512		19.6419
											16.7372		14.601		12.7423		17.2053
											20.4391		17.4609		18.59		23.7542
											16.5633		14.9616		17.1645		17.706
											18.2824		16.463		16.2992		20.3275
											19.3029		18.0782		15.6773		16.1915
											17.9986		21.1228		17.4487		18.6355
											19.5738		17.9946		15.9824		24.1287
											18.3344		22.1124		12.9243		13.612
											15.4425		12.0971		15.2865		18.902
											21.5118		17.9144		15.4292		19.0663
											20.528		13.2285		15.5993		21.4681
											16.0036		20.2307		14.6545		19.8332
											17.6725		17.0621		15.9038		18.2255
											15.0713		20.4216		13.9592		17.0747
											18.0941		15.4867		19.9602		18.7217
											21.301		16.9355		17.2539		23.4454
											15.1512		14.8231		18.2906		18.6489
											19.0317		17.0339		15.8918		18.5724
											17.931		15.4922		17.0318		18.8133
											18.5155		16.0937		15.009		19.4604
											18.6126		18.5924		17.1244		19.932
											16.5812		17.1282		11.0692		20.9493
											18.0648		17.6757		14.3262		15.7881
											21.1868		17.6887		17.0605		18.6175
											16.8697		20.643		16.658		20.6474
											21.1377		22.1469		18.2837		22.6325
											15.0787		16.1622		17.4855		21.4605
											18.0037		17.1361		15.2276		19.1966
											17.7843		17.5978		11.9397		17.4338
											18.6899		17.3844		18.9183		17.9098
											19.4159		20.8281		19.1447		21.169
											15.9658		14.8619		17.6324		20.6087
											20.6232		20.6799		14.6741		21.6363
											17.4129		14.6919		15.1603		18.9858
											16.4522		18.68		16.7205		19.9618
											15.944		19.0679		10.9778		21.0177
											22.0324		21.5382		17.9465		22.7691
											20.4517		16.1696		10.9492		22.5874
											14.8931		19.3955		14.6104		16.5064
											17.2557		18.9594		12.7703		21.4823
											18.6545		20.0337		11.4456		19.9605
											19.8798		14.7663		18.7624		22.2561
											18.9912		16.6605		13.0148		18.6001
											19.174		15.088		17.1379		17.6533
											16.2592		18.668		12.1969		24.7515
											17.6209		16.3693		17.5915		19.3764
											21.057		19.5917		17.3386		17.9505
											20.9511		15.0148		19.5677		19.0365
											17.6099		18.0839		18.2074		18.471
											19.8422		20.9698		16.7151		15.0862
											20.0312		14.4159		15.9323		18.0952
											20.5151		15.9509		16.5508		18.8754
											20.9111		19.5203		19.2301		16.8676
											14.1245		15.2827		20.0342		20.0159
											18.5823		15.8473		19.8505		16.8726
											15.6857		19.0073				17.5613
											20.3633		18.2896				20.3786
											16.5712		17.2589				19.7818
											17.1294		19.0781				24.2781
											20.609		18.0709				17.5406
											16.7653		18.3632				18.6854
											17.6271		20.7699				17.6963
											17.975		18.6239				19.5201
											15.8035		17.6694				18.6795
											18.3884		20.2833				21.2733
											17.337		18.3954				19.1521
											20.4268		16.9049				20.1567
											14.5271		21.6494				19.6006
											19.0058		18.7365				18.5022
											19.6594		20.1284				20.3004
											15.1326		14.7728				17.2401
											17.881		19.1738				18.4725
											16.3445		16.2317				18.4753
											17.5964		20.0901				18.7473
											19.8626		18.1705				19.3122
											19.3042		17.7862				18.6235
											21.1835		16.2841				19.8417
											20.0803		17.5379				21.9532
											18.5722		15.7389				17.6666
											18.9092		19.8959				19.7355
											18.8294		18.8474				23.8081
											17.2816		19.0416				17.1583
											20.5392		17.9087				15.0097
											19.3245		18.1764				17.4375
											17.1054		16.725				20.5256
											19.7341		22.5361				23.1992
											16.7914		14.6658				19.8096
											21.2488		12.7961				18.8309
											18.3752		19.1287				19.4976
											16.4591		14.6926				18.718
											16.6831		17.5144				20.6457
											16.4126		16.935				21.6615
											17.2685		15.3504				18.6902
											21.6128		16.7846				22.2015
											15.6683		19.585				24.1926
											16.8621		18.5218				16.7799
											15.0994		16.5511				17.435
											17.9672		16.4279				17.1796
											20.8368		16.0253				17.8924
											17.5688		21.4785				18.0631
											20.617		21.6278				21.7637
											16.3369		16.0393				18.4208
											15.966		15.5073				16.4302
											19.3858		15.0468				22.0689
											15.6523		17.7174				20.0769
											14.7202		17.2133				21.8491
											19.9202		13.9151				22.8721
											15.3239		11.5839				19.459
											18.5287		14.2868				17.6497
											16.9485		17.2559				19.0887
											18.6359		19.0886				23.8671
											19.2189		15.472				22.2585
											13.2564		10.7805				19.0677
											18.0963		13.1049				21.0885
											14.2659		20.7189				17.4739
											14.9261		16.004				17.3559
											18.6944		14.7841				17.0242
											20.7489		18.0459				21.884
											17.0556		19.834				19.899
											21.8422		20.2544				21.2516
											17.6892		14.338				15.1271
											20.3499		18.8896				23.2367
											17.3029		17.6616				18.4701
											20.1727		16.7156				16.5961
											19.5997		19.3723				21.1066
											16.6896		19.3795				17.9013
											16.6378		13.0031				21.4624
											20.6429		17.2423				20.1022
											17.74		20.6108				19.1868
											13.3697		17.9007				19.1735
											22.6532		19.1757				18.047
											15.8605		14.5002				18.509
											21.8512		17.3967				21.402
											18.1802		17.2038				17.823
											17.8669		19.7049				18.4291
											19.105		18.7917				17.7076
											12.3709		19.228				17.3084
											18.2308		18.8744				20.065

## Sheet: Figure 5E
Cell directionality (Cos θ)
In vivo										In-silico
Control (DMSO)		Notch inhibition (CompE)		Control		Notch LOF		Notch GOF		1:2 control		1:3 control		All Followers		All Leaders
Leaders	Followers	Leaders	Followers	Leaders	Followers	Leaders	Followers	Leaders	Followers	Leaders	Followers	Leaders	Followers	Leaders	Followers	Leaders	Followers
-0.01534	-0.344498	-0.09456	-0.35935	0.070036	-0.21987	-0.13935	-0.1958	0.037725	-0.21363	0.200687	0.173112	0.207591	0.278865	0.255097	0.178678	0.107195	0.131653
0.013066	-0.228619	-0.08511	-0.24235	0.093425	-0.20188	-0.07687	-0.0624	0.048947	-0.13736	0.171334	0.284135	0.211229	0.210447	0.137763	0.123295	0.212762	0.162418
0.034966	-0.197511	-0.08032	-0.21056	0.158488	-0.05997	0.012796	0.047262	0.055257	-0.13339	0.208596	0.259112	0.22768	0.305261	0.162096	0.220363	0.113878	0.170654
0.059507	-0.123465	-0.0585	-0.17632	0.160271	-0.0514	0.023299	0.086974	0.104858	-0.10711	0.299936	0.162137	0.249417	0.287026	0.238229	0.218558	0.251034	0.259177
0.107618	-0.115707	-0.04728	-0.17477	0.2028	-0.03751	0.036251	0.087856	0.130868	-0.10425	0.23494	0.223657	0.243305	0.132703	0.201007	0.128803	0.236406	0.229703
0.108282	-0.112174	-0.04489	-0.17447	0.230767	-0.03661	0.08063	0.114412	0.14071	-0.09269	0.227255	0.0511249	0.232824	0.159741	0.141631	0.23215	0.204387	0.239198
0.109312	-0.0855814	-0.0343	-0.17194	0.245011	-0.02421	0.085942	0.1305	0.147698	-0.07591	0.195403	0.131261	0.134745	0.153645	0.196715	0.133297	0.142241	0.219666
0.127222	-0.0768254	-0.03083	-0.17035	0.245552	-0.01933	0.110505	0.1405	0.151629	-0.06963	0.235306	0.208963	0.192595	0.161585	0.220377	0.131878	0.145729	0.278292
0.128343	-0.0719845	-0.02982	-0.14714	0.270655	-0.011	0.124424	0.194775	0.157242	-0.05549	0.221985	0.185267	0.243242	0.235625	0.179432	0.126688	0.129964	0.230934
0.142238	-0.0468647	-0.02042	-0.14284	0.305378	0.004182	0.157146	0.2365	0.160929	-0.0539	0.20785	0.19736	0.318029	0.240911	0.243604	0.20263	0.107963	0.301805
0.165505	-0.0406532	-0.00854	-0.13565	0.360788	0.007719	0.251704	0.331603	0.16411	-0.05006	0.285772	0.163907	0.174162	0.290534	0.165423	0.124258	0.172795	0.220488
0.170596	-0.0379061	0.003226	-0.09897	0.39634	0.012869		0.368812	0.164872	-0.04943	0.19422	0.150685	0.213403	0.163919	0.215956	0.0849335	0.281801	0.236944
0.18356	-0.0359244	0.005603	-0.09684	0.434181	0.026671		0.385486	0.196126	-0.04296	0.261522	0.113127	0.183023	0.125791	0.216764	0.10321	0.0529284	0.187086
0.194724	-0.0322091	0.01102	-0.08767	0.587634	0.028654		0.397515	0.211448	-0.04025	0.242231	0.0644909	0.173589	0.246582	0.189081	0.182963	0.219691	0.246056
0.203159	-0.0283679	0.013633	-0.08479		0.028704		0.40079	0.247634	-0.03979	0.248466	0.192523	0.258182	0.153315	0.175961	0.0656239	0.199187	0.181083
0.219664	0.0010828	0.018338	-0.08189		0.030581		0.423169	0.263815	-0.03836	0.0856882	0.265884	0.193198	0.12435	0.220105	0.204033	0.107836	0.268923
0.222282	0.0168736	0.019594	-0.07923		0.036046		0.444218	0.275435	-0.03381	0.205018	0.16562	0.179742	0.233541	0.179177	0.111011	0.224745	0.290674
0.250483	0.0196908	0.028823	-0.07852		0.044164		0.476007	0.296613	-0.00573	0.350082	0.22044	0.207304	0.20829	0.128559	0.142252	0.165643	0.263519
0.262335	0.0234179	0.029199	-0.07752		0.056109		0.63744	0.305518	0.002448	0.311459	0.188367	0.176559	0.193312	0.267164	0.14185	0.218725	0.262991
0.273022	0.0264979	0.034509	-0.07004		0.057155			0.335932	0.002739	0.323519	0.174005	0.279568	0.144781	0.239784	0.0435808	0.186182	0.306171
0.27331	0.0312852	0.049293	-0.06916		0.066574			0.368786	0.007072	0.294207	0.261078	0.0966223	0.15691	0.160174	0.189282	0.117807	0.318179
0.315605	0.0495815	0.052494	-0.06791		0.081287			0.475587	0.010981	0.250134	0.227754	0.172619	0.113179	0.179005	0.215776	0.241251	0.280154
0.31926	0.0575762	0.059651	-0.06192		0.090496			0.506797	0.017557	0.319785	0.213779	0.227096	0.201712	0.176339	0.183833	0.279757	0.284519
0.477494	0.0589811	0.062783	-0.05591		0.095801				0.030157	0.149427	0.205796	0.0998942	0.294517	0.221363	0.195222	0.157507	0.126935
0.512635	0.061902	0.063228	-0.05235		0.096601				0.04017	0.229184	0.178347	0.148888	0.304093	0.210718	0.129783	0.229848	0.138382
	0.0639465	0.066553	-0.04957		0.110421				0.049803	0.241566	0.249543	0.251761	0.269785	0.156391	0.26591	0.206645	0.217611
	0.0695452	0.069847	-0.04949		0.112704				0.050025	0.22689	0.23903	0.162155	0.215274	0.0854316	0.188685	0.176971	0.243098
	0.0761747	0.070202	-0.04914		0.125955				0.051547	0.252463	0.230804	0.223583	0.1851	0.0837005	0.210655	0.216478	0.180803
	0.0762879	0.081188	-0.04689		0.129804				0.052732	0.256149	0.236917	0.137549	0.16196	0.25445	0.401245	0.154776	0.162892
	0.0813266	0.081884	-0.04319		0.130558				0.054	0.163516	0.2237	0.239271	0.267372	0.186393	0.199392	0.119549	0.403489
	0.0819905	0.085626	-0.03717		0.135125				0.056299	0.153043	0.243002	0.219043	0.202882	0.199627	0.172569	0.241186	0.321448
	0.103223	0.092549	-0.03625		0.137339				0.061031	0.320291	0.322069	0.248703	0.22731	0.20043	0.129027	0.270808	0.285827
	0.105868	0.113777	-0.03521		0.144613				0.064003	0.182315	0.256812	0.206525	0.287097	0.160431	0.130735	0.152217	0.29325
	0.105873	0.126735	-0.0338		0.159527				0.069743	0.223377	0.318411	0.189833	0.204964	0.173368	0.19651	0.0996754	0.212653
	0.120306	0.128531	-0.03105		0.167635				0.083447	0.184906	0.211985	0.273013	0.286746	0.307814	0.148993	0.231244	0.200631
	0.120385	0.133773	-0.02839		0.168724				0.084075	0.281256	0.263677	0.263657	0.167013	0.267651	0.188022	0.168517	0.192792
	0.124667	0.15122	-0.02782		0.168953				0.087115	0.273313	0.302924	0.163647	0.128025	0.213649	0.16974	0.151382	0.248011
	0.126876	0.153148	-0.02515		0.177132				0.088496	0.361866	0.274237	0.304749	0.2065	0.183227	0.177447	0.0352447	0.148683
	0.134709	0.154975	-0.02327		0.186872				0.096504	0.404579	0.124028	0.257788	0.238117	0.164594	0.292509	0.240494	0.25249
	0.143866	0.251319	-0.02254		0.189154				0.098032	0.274093	0.254338	0.156103	0.157595	0.140951	0.0589948	0.189392	0.315133
	0.14394	0.253132	-0.02161		0.193351				0.103319	0.100444	0.276034	0.230182	0.0770845	0.134585	0.103964	0.159397	0.25696
	0.145729	0.26164	-0.02085		0.196211				0.105021	0.340803	0.279777	0.213359	0.171864	0.208482	0.0113668	0.183149	0.223178
	0.14804		-0.02033		0.208588				0.114832	0.318468	0.258169	0.280501	0.0662294	0.159507	0.221295	0.119723	0.0446702
	0.159229		-0.01588		0.221672				0.115273	0.254373	0.219263	0.208668	0.218636	0.19243	0.257313	0.16504	0.186288
	0.159416		-0.01569		0.222348				0.119955	0.354293	0.200317	0.192546	0.333069	0.13817	0.146362	0.16606	0.192737
	0.2005		-0.01446		0.22408				0.120329	0.278409	0.199383	0.289514	0.212402	0.174647	0.0897714	0.206519	0.244832
	0.214513		-0.00839		0.234519				0.122836	0.205211	0.145416	0.137731	0.187973	0.11368	0.147329	0.183028	0.335555
	0.251211		-0.00822		0.234788				0.124088	0.252524	0.329784	0.18087	0.109778	0.116475	0.0997307	0.120561	0.159036
	0.252471		-0.00639		0.238408				0.124618	0.20665	0.169903	0.210461	0.223807	0.2124	0.169775	0.14295	0.22528
	0.304616		-0.00554		0.257465				0.126256	0.230225	0.312284	0.218362	0.302869	0.235123	0.0658449	0.243929	0.221973
			-0.00411		0.259325				0.126906	0.206482	0.286637	0.296427	0.20788	0.176547	-0.0040922	0.316522	0.173962
			-0.00257		0.263954				0.127525	0.221248	0.205864	0.303751	0.282468	0.166545	0.264041	0.341914	0.271126
			-0.00187		0.266265				0.130387	0.273943	0.274254	0.270273	0.292579	0.216636	0.272526	0.150011	0.201739
			0.003656		0.274286				0.136625	0.239632	0.197443	0.255061	0.224367	0.210358	0.257333	0.043608	0.124061
			0.005042		0.291846				0.1378	0.145163	0.183649	0.178597	0.225134	0.168412	0.291887	0.142329	0.151797
			0.007792		0.307898				0.139514	0.331038	0.245141	0.229369	0.0321624	0.162407	0.306346	0.271745	0.165849
			0.008274		0.313129				0.143118	0.358442	0.311314	0.27035	0.0725676	0.231693	0.105952	0.176671	0.193413
			0.00859		0.338372				0.145027	0.236366	0.255774	0.185537	0.179489	0.244815	0.124142	0.243181	0.256482
			0.009165		0.358084				0.146962	0.238886	0.248372	0.0945669	0.108367	0.214059	0.266815	0.219188	0.301594
			0.009272		0.361128				0.148427	0.222616	0.24479	0.128892	0.299762	0.235638	0.25619	0.138714	0.197506
			0.010262		0.362282				0.148477	0.176468	0.192769	0.146395	0.209418	0.179907	0.0730899	0.159577	0.182411
			0.012222		0.363834				0.149098	0.235147	0.146355	0.199358	0.170261	0.204573	0.130805	0.241177	0.19457
			0.013559		0.373063				0.150129	0.180023	0.256725	0.31678	0.160086	0.245509	0.0800312	0.21633	0.126664
			0.015685		0.394039				0.150795	0.204651	0.156048	0.194685	0.163987	0.119876	0.13812	0.135024	0.255111
			0.017179		0.399517				0.15459	0.229733	0.184303	0.144464	0.254946	0.064263	0.221538	0.291597	0.227562
			0.018845		0.403587				0.159264	0.268249	0.121948	0.222855	0.272978	0.221335	0.135867	0.238154	0.237405
			0.021558		0.427795				0.159325	0.229166	0.321085	0.170803	0.295816	0.195627	0.216552	0.174886	0.240326
			0.022131		0.452127				0.16272	0.168098	0.272397	0.166846	0.173526	0.210969	0.186016	0.350121	0.213292
			0.022351		0.458344				0.165142	0.15702	0.33751	0.288821	0.166957	0.211341	0.234691	0.196109	0.0967067
			0.02301		0.47412				0.16558	0.245873	0.213279	0.247234	0.219202	0.177233	0.0909895	0.202444	0.113709
			0.023528		0.481342				0.172274	0.27889	0.271181	0.195309	0.314828	0.200277	0.164508	0.155295	0.253029
			0.023819		0.491618				0.175402	0.293746	0.246646	0.187716	0.100348	0.201126	0.284899	0.150715	0.370226
			0.025918		0.495539				0.17622	0.296676	0.310568	0.221982	0.180045	0.227535	0.259434	0.276649	0.22731
			0.026074		0.52176				0.17829	0.245629	0.268956	0.214997	0.119766	0.0765078	0.0909121	0.180965	0.30182
			0.028554		0.526737				0.186816	0.166742	0.214072	0.160691	0.181495	0.199843	0.119277	0.227787	0.248137
			0.028881		0.539406				0.189412	0.25125	0.315213	0.170494	-0.057031	0.141453	0.171001	0.216801	0.193646
			0.02906		0.571353				0.196134	0.260658	0.311889	0.252002	0.288104	0.219167	0.242686	0.194479	0.188466
			0.029415		0.638353				0.198087	0.299589	0.309944	0.271665	0.247753	0.186795	0.192432	0.315434	0.250953
			0.033795						0.199529	0.379481	0.268901	0.286322	0.251535	0.190344	0.11929	0.220412	0.218978
			0.034656						0.200667	0.197385	0.215091	0.23901	0.200359	0.143566	0.190084	0.181861	0.151096
			0.035121						0.204089	0.193268	0.361612	0.134594	0.201634	0.195012	0.149595	0.223676	0.213675
			0.035802						0.215919	0.221688	0.272441	0.166524	0.203104	0.187371	0.105457	0.25421	0.293434
			0.036188						0.221019	0.312517	0.303398	0.310053	0.258224	0.198751	0.153997	0.192303	0.172268
			0.036352						0.231042	0.127599	0.250689	0.127587	0.301465	0.15607	0.28569	0.204239	0.224676
			0.036737						0.232385	0.260522	0.28282	0.204999	0.142179	0.120443	0.319263	0.106944	0.225654
			0.038897						0.254045	0.252796	0.251542	0.210441	0.20455	0.113679	0.265626	0.243416	0.179368
			0.040569						0.258016	0.302673	0.112976	0.213015	0.314015	0.220815	0.0259983	0.145798	0.295087
			0.042274						0.259125	0.233887	0.0933992	0.183483	0.162914	0.16267	0.122068	0.224203	0.31176
			0.043432						0.264376	0.148405	0.332201	0.26064	0.225681	0.20186	0.160279	0.155144	0.282365
			0.046454						0.26609	0.25013	0.161807	0.218837	0.195876	0.189235	0.103053	0.156785	0.246737
			0.047709						0.270499	0.266649	0.29365	0.198579	0.142227	0.221004	0.186714	0.22586	0.209309
			0.052076						0.271651	0.293183	0.220034	0.246997	0.132878	0.187504	0.139698	0.196785	0.26082
			0.05219						0.27332	0.173339	0.187294	0.205756	0.230463	0.141264	0.199008	0.19492	0.24754
			0.052617						0.279702	0.253743	0.283645	0.250809	0.274078	0.121101	0.364609	0.266543	0.110224
			0.053046						0.284331	0.277469	0.223247	0.203219	0.323032	0.219731	0.147348	0.210739	0.125639
			0.054371						0.286149	0.23698	0.267639	0.185881	0.163513	0.214999	0.204106	0.183981	0.19904
			0.056498						0.293584	0.233445	0.179937	0.27452	0.272537	0.17091	0.132801	0.183941	0.362109
			0.057362						0.30162	0.230427	0.223504	0.222228	0.160867	0.204532	0.165258	0.0838503	0.204186
			0.059222						0.303832	0.221382	0.19104	0.247792	0.180476	0.228761	0.153323	0.234418	0.334905
			0.061781						0.315076	0.29238	0.31024	0.188287	0.12004	0.0978623	0.106855	0.25636	0.101781
			0.062602						0.326404		0.255617		0.256795		0.173433		0.117455
			0.063535						0.326526		0.183695		0.173507		-0.0208131		0.322303
			0.064943						0.334737		0.198618		0.225361		0.102337		0.313875
			0.065085						0.335279		0.262888		0.297167		0.227827		0.335621
			0.066017						0.343777		0.191775		0.176331		0.191097		0.314289
			0.068049						0.345355		0.303389		0.262777		0.216179		0.260729
			0.069511						0.346357		0.0999471		0.273251		0.0920735		0.340097
			0.069587						0.358347		0.248784		0.233576		0.0766836		0.38741
			0.072512						0.405685		0.0516906		0.298719		0.17922		0.322694
			0.074035						0.497241		0.270653		0.237604		0.13143		0.206708
			0.074047						0.507371		0.245715		0.145173		0.181325		0.31787
			0.07541						0.619515		0.275203		0.278527		0.0375967		0.275689
			0.0764						0.662776		0.119331		0.136105		0.0808527		0.19012
			0.077069								0.13521		0.15782		0.308706		0.242598
			0.078365								0.166922		0.202731		0.16045		0.294529
			0.078514								0.0965425		0.102933		0.166602		0.358259
			0.078695								0.0877599		0.141796		0.193891		0.292298
			0.08089								0.122075		0.243514		-0.0251493		0.274041
			0.08135								0.218215		0.151124		0.148305		0.189428
			0.086726								0.266133		0.239647		0.198728		0.167246
			0.090683								0.190079		0.38679		0.107442		0.119468
			0.092487								0.289832		0.176803		0.0366898		0.229827
			0.096004								0.354563		0.321376		0.036285		0.0130289
			0.096062								0.230735		0.285032		0.0118217		0.178831
			0.096306								0.221362		0.33207		0.120577		0.292488
			0.097715								0.220855		0.238777		0.268567		0.241279
			0.098808								0.269417		0.26823		0.0746929		0.25988
			0.100418								0.0991576		0.278867		0.217212		0.117338
			0.101425								0.13274		0.305992		0.0911291		0.200467
			0.102813								0.181803		0.112912		0.0330716		0.294112
			0.102836								0.142608		0.202749		0.242209		0.258266
			0.104176								0.0455079		0.206116		0.346003		0.189672
			0.104642								0.284314		0.255464		0.158089		0.284076
			0.106429								0.1865		0.278556		0.135655		0.231422
			0.106457								0.144337		0.193987		0.12925		0.331383
			0.108542								0.222567		0.294671		0.146968		0.292736
			0.109632								0.171773		0.283103		0.279759		0.240107
			0.112231								0.210203		0.174398		0.165924		0.17404
			0.115127								0.195097		0.283866		0.223791		0.206861
			0.116057								0.310141		0.311323		0.158174		0.222153
			0.119532								0.197442		0.117326		0.059333		0.152501
			0.120595								0.226307		0.129907		0.166371		0.221636
			0.120736								0.120611		0.202526		0.0731283		0.234031
			0.122245								0.308743		0.22683		0.108278		0.269027
			0.122602								0.278353		0.154651		0.142239		0.310837
			0.122797								0.330607		0.251871		0.216042		0.170557
			0.125665								0.376761		0.312179		0.224719		0.187537
			0.126403								0.335973		0.294877		0.214762		0.256203
			0.126428								0.276495		0.16046		0.258714		0.360091
			0.130108								0.283721		0.315824		0.100402		0.267394
			0.133968								0.381709		0.202226		0.219909		0.181693
			0.134402								0.246429		0.256296		0.161097		0.189826
			0.135022								0.17693		0.226136		0.240413		0.282572
			0.136882								0.435798		0.255833		0.203686		0.252276
			0.138662								0.325329		0.363095		0.260504		0.168179
			0.138963								0.29606		0.226649		0.191397		0.0868009
			0.139098								0.230363		0.250494		0.028625		0.174318
			0.1406								0.193542		0.322851		0.0686129		0.209565
			0.141167								0.271004		0.208499		0.144131		0.187303
			0.142234								0.0996154		0.141737		0.132461		0.159248
			0.145688								0.0696212		0.0947178		0.208696		0.219224
			0.147001								0.121515		0.254031		0.10934		0.102951
			0.155143								0.25359		0.277078		0.181294		0.14731
			0.155386								0.366927		0.454371		0.253294		0.266468
			0.156153								0.386103		0.371714		0.258766		0.204842
			0.159733								0.280195		0.248171		0.291249		0.149495
			0.160632								0.261489		0.173398		0.207996		0.167104
			0.161786								0.219023		0.232189		0.195379		0.170458
			0.162302								0.106497		0.198029		0.1273		0.19745
			0.165793								0.157774		0.177552		0.257459		0.105951
			0.173276								0.191079		0.265341		0.0584097		0.296357
			0.180541								0.223796		0.162396		0.135422		0.19768
			0.18396								0.269332		0.218842		0.115796		0.217405
			0.186311								0.0737949		0.116462		0.1726		0.260644
			0.187788								0.286076		0.253978		0.171888		0.240575
			0.188219								0.135239		0.310945		0.1027		0.239285
			0.192726								0.234141		0.159548		0.105693		0.31386
			0.194782								0.237067		0.246161		0.453102		0.13906
			0.195412								0.18176		0.0849588		0.172499		0.18146
			0.198086								0.29443		0.240831		0.222134		0.178152
			0.199254								0.307946		0.340909		0.186993		0.147957
			0.199932								0.33419		0.185171		0.287674		0.226393
			0.21127								0.325719		0.207545		0.141327		0.170231
			0.220568								0.285488		0.204624		0.178906		0.262958
			0.222725								0.302092		0.172311		0.277293		0.19712
			0.22322								0.192244		0.232586		0.290427		0.253385
			0.2244								0.309543		0.250599		0.111472		0.29804
			0.23666								0.244962		0.189606		0.203828		0.214694
			0.241317								0.217294		0.247823		0.226991		0.162598
			0.251974								0.261096		0.177131		0.20553		0.31651
			0.255362								0.250863		0.203884		0.271313		0.14713
			0.260707								0.201893		0.225729		0.211036		0.356973
			0.290422								0.225401		0.250827		0.181845		0.281698
			0.294531								0.32862		0.166262		0.217972		0.262393
			0.300754								0.0745889		0.21617		0.205347		0.310481
			0.325037								0.256755		0.172594		0.185341		0.178472
			0.341517								0.218273		0.280868		0.225485		0.353569
			0.353972								0.185282		0.278424		0.11066		0.253827
			0.372899								0.167845		0.165142		0.163394		0.334474
			0.378124								0.192425		0.115716		0.0904034		0.415604
			0.385592								0.249975		0.167971		0.0874089		0.233161
			0.408273								0.189693		0.155241		0.15485		0.261586
			0.483887								0.271334		0.241163		0.0699779		0.0900024
											0.221031		0.163611		0.108831		0.208135
											0.047459		0.241529		0.181916		0.126099
											0.179474		0.400352		0.252353		0.21515
											0.106504		0.28936		0.160231		0.300244
											0.0757773		0.267194		0.306623		0.171045
											0.297499		0.267312		0.239568		0.306955
											0.170615		0.304306		0.33269		0.112763
											0.286017		0.214033		0.219417		0.253819
											0.23979		0.186114		0.176026		0.294569
											0.240372		0.162536		0.15964		0.279887
											0.273966		0.165329		0.165491		0.341256
											0.298649		0.164571		0.131734		0.0740342
											0.234401		0.17745		0.158254		0.281651
											0.262324		0.0334763		0.167496		0.315523
											0.247798		0.181412		0.270503		0.234334
											0.196225		0.132435		0.198936		0.160452
											0.193473		0.275336		0.192563		0.199396
											0.082139		0.185348		0.0990469		0.215288
											0.240509		0.269596		0.00766803		0.252938
											0.283877		0.219199		0.222252		0.272292
											0.156953		0.230608		0.185373		0.156842
											0.354148		0.250723		0.0592035		0.304376
											0.512559		0.212797		0.172691		0.170862
											0.273717		0.296153		0.123703		0.34775
											0.297497		0.156865		0.00408746		0.204113
											0.380623		0.270919		0.109184		0.128907
											0.256076		0.204255		0.16419		0.146489
											0.215454		0.255626		0.127407		0.291435
											0.296122		0.211242		0.152745		0.249843
											0.284544		0.298836		0.229707		0.350244
											0.193817		0.333615		0.136062		0.279178
											0.233855		0.206248		0.131195		0.285184
											0.185081		0.249296		0.0786583		0.251593
											0.165418		0.0732114		0.0887406		0.195677
											0.245357		0.197648		0.147952		0.266585
											0.219863		0.138982		0.175914		0.25687
											0.371119		0.123527		0.129768		0.19648
											0.318596		0.308957		0.308264		0.222051
											0.281455		0.0305928		0.155954		0.182211
											0.241191		0.209989		0.263537		0.182729
											0.305144		0.294983		0.174132		0.149748
											0.0206533		0.240848		0.107158		0.217036
											0.212637		0.143677		0.207668		0.285019
											0.152348		0.159073		0.158216		0.186435
											0.0404895		0.223814		0.174386		0.249766
											0.322539		0.18851		0.179613		0.237552
											0.201636		0.176437		0.287811		0.204509
											0.246604		0.199199		0.0728513		0.120355
											0.344413		0.242646		0.181034		0.275031
											0.21745		0.120722		0.272402		0.133713
											0.155389		0.213333		0.140941		0.159843
											0.197307		0.313947		0.0903047		0.164485
											0.26129		0.213672		-0.0521274		0.124556
											0.201893		0.290412		0.214809		0.1625
											0.315982		0.249344		0.174584		0.170663
											0.209616		0.157902		0.228607		0.231096
											0.247903		0.1943		0.25874		0.260589
											0.301123		0.254423		0.146042		0.180005
											0.242181		0.18895		0.212475		0.26157
											0.353576		0.278161		0.0694834		0.201891
											0.0844064		0.307123		0.07451		0.212763
											0.108528		0.358506		0.119979		0.150432
											0.314868		0.329119		0.193444		0.206163
											0.273495		0.194841		0.131847		0.262929
											0.136011		0.239097		0.184336		0.357536
											0.130311		0.206546		0.162374		0.219483
											0.266524		0.381374		0.316064		0.237359
											0.130001		0.243122		0.064632		0.235225
											0.201173		0.344023		0.219417		0.137858
											0.225587		0.152162		0.103977		0.257325
											0.282367		0.228281		0.184722		0.168674
											0.0750086		0.319327		0.178293		0.25103
											0.09905		0.128214		0.193876		0.245529
											0.185646		0.332812		0.152307		0.277048
											0.0570245		0.123613		0.262709		0.235228
											0.294924		0.133615		0.190054		0.283496
											0.238554		0.289189		0.225504		0.258946
											0.197711		0.220149		0.201309		0.295845
											0.21443		0.257946		0.0961456		0.350895
											0.2623		0.261203		0.169254		0.174535
											0.137108		0.181132		0.165373		0.276419
											0.148379		0.174589		0.271707		0.197271
											0.229857		0.225526		0.218849		0.244105
											0.281142		0.130407		0.153387		0.23884
											0.211058		0.279823		0.0515891		0.158361
											0.222705		0.278086		0.206091		0.280499
											0.241567		0.231977		0.200877		0.300784
											0.30238		0.240419		0.1585		0.229158
											0.257752		0.289391		0.198698		0.298697
											0.191122		0.155013		0.186215		0.123764
											0.178485		0.277529		0.168884		0.134975
											0.178333		0.266467		0.169254		0.259118
											0.150168		0.331171		0.223429		0.28357
											0.236222		0.271273		0.113152		0.175669
											0.259595		0.267332		0.201886		0.106287
											0.261188		0.201939		0.123711		0.36033
											0.267971		0.212143				0.219363
											0.288859		-0.0049286				0.123038
											0.313159		0.310499				0.261302
											0.246637		0.204965				0.207708
											0.304089		0.205824				0.251745
											0.257132		0.303137				0.208328
											0.241725		0.194521				0.27805
											0.301773		0.21574				0.325893
											0.211329		0.251105				0.244136
											0.182888		0.212881				0.363457
											0.235193		0.266834				0.269
											0.342489		0.162541				0.310098
											0.291732		0.186999				0.217275
											0.124384		0.19595				0.309283
											0.291816		0.252752				0.264555
											0.250709		0.169983				0.269559
											0.22068		0.277929				0.222256
											0.194575		0.21155				0.187828
											0.188111		0.339709				0.226452
											0.179278		0.14289				0.191305
											0.250477		0.263929				0.215864
											0.0955857		0.195183				0.10089
											0.252323		0.257318				0.322987
											0.0864179		0.239741				0.310408
											0.217959		0.215632				0.193276
											0.243443		0.262473				0.249047
											0.138411		0.242735				0.203497
											0.163711		0.305503				0.30397
											0.145407		0.245013				0.22493
											0.284365		0.235144				0.284712
											0.173684		0.142811				0.202491
											0.319497		0.22453				0.143254
											0.263162		0.413815				0.298896
											0.229657		0.29958				0.197626
											0.313905		0.326972				0.223259
											0.262962		0.132378				0.107917
											0.192613		0.251629				0.152655
											0.237696		0.210754				0.208258
											0.130109		0.293802				0.254791
											0.256035		0.225059				0.184861
											0.164181		0.219729				0.286999
											0.437767		0.158226				0.270035
											0.273756		0.0911418				0.130767
											0.264685		0.214713				0.153742
											0.234227		0.225007				0.195007
											0.29309		0.223194				0.240108
											0.224338		0.19702				0.22189
											0.254448		-0.0225219				0.275969
											0.168104		0.196592				0.308194
											0.322569		0.201753				0.209571
											0.251405		0.229885				0.183107
											0.0964624		0.209842				0.227563
											0.185046		0.203734				0.301067
											0.0599604		0.0788644				0.286921
											0.146963		0.298074				0.27448
											0.298702		0.264735				0.257145
											0.179034		0.262358				0.302188
											0.32855		0.371753				0.40383
											0.191202		0.190596				0.149162
											0.270343		0.228788				0.138928
											0.260477		0.0331237				0.304041
											0.274807		0.173098				0.226964
											0.185143		0.299112				0.255699
											0.340858		0.237299				0.279592
											0.296981		0.266722				0.192061
											0.213599		0.232545				0.239349
											0.128183		0.250769				0.235752
											0.280337		0.286763				0.267957
											0.152032		0.202322				0.222791
											0.256818		0.298327				0.309637
											0.176553		0.304985				0.16205
											0.158488		0.296536				0.0893355
											0.229506		0.124364				0.201379
											0.215038		0.292211				0.367003
											0.202326		0.246113				0.256698
											0.191799		0.120461				0.284113
											0.186754		0.264533				0.303857
											0.280024		0.142893				0.274218
											0.234675						0.231769
											0.219578						0.328664
											0.242846						0.244002
											0.200981						0.264898
											0.262817						0.151834
											0.221362						0.170253
											0.329414						0.145789
											0.167249						0.235129
											0.153352						0.17888
											0.276272						0.339316
											0.22156						0.308889
											0.194126						0.261009
											0.0898375						0.263797
											0.32878						0.225764
											0.193623						0.358333
											0.167417						0.282279
											0.249877						0.27051
											0.206381						0.0347329
											0.351724						0.216188
																	0.205995
																	0.323609
																	0.28532
																	0.264362
																	0.258405
																	0.208584
																	0.304198
																	0.335124
																	0.285592
																	0.271481
																	0.27675
																	0.158873
																	0.236863
																	0.227851
																	0.258882
																	0.230293
																	0.30281
																	0.247981
																	0.325802
																	0.222716
																	0.277873
																	0.270659
																	0.383865
																	0.169311
																	0.141127
																	0.225563
																	0.283329
																	0.244191
																	0.185979
																	0.230255
																	0.132515
																	0.216349
																	0.264749
																	0.254016
																	0.286944
																	0.189226
																	0.257777
																	0.218708
																	0.244693
																	0.296351
																	0.309197
																	0.318641
																	0.26941
																	0.235751
																	0.224499
																	0.220791
																	0.217781
																	0.128836
																	0.157581
																	0.228962
																	0.269674
																	0.218338
																	0.236427
																	0.322458
																	0.347083
																	0.218446
																	0.245421
																	0.298658
																	0.236856
																	0.228933
																	0.0737673
																	0.0912763
																	0.244368
																	0.232054
																	0.32999
																	0.222543
																	0.244474

## Sheet: Figure 6G
Cummulative number of dots in 4 chains
Control	Notch GOF	Control (DMSO)	Notch inhibition
55	212	60	3
33	195	35	7
48	106	22	1
25	78	51	4
37	117	38	11
62	102	10	2
29	97	32	3
12	74	43	7
35	116	27	1
43	115	39	2
19	122	25	1
31	89
51	93
	111

## Sheet: Figure 7D
Cell number	Cell Type	Speed	Directionality	Ventral Distance		Cell number	Cell Type	Speed	Directionality	Ventral Distance
1	Leader	19.2864	-0,01534	129,26		1	Follower	20.1481	-0,3444977	86,36
2	Leader	19.0233	0,013066	140,83		2	Follower	19.4557	-0,2286194	92,14
3	Leader	22.6039	0,034966	109,78		3	Follower	12.3056	-0,1975109	88,86
4	Leader	18.6264	0,059507	95,08		4	Follower	13.7828	-0,123465	87,13
5	Leader	19.4326	0,107618	93,78		5	Follower	13.8075	-0,1157074	88,56
6	Leader	20.0895	0,108282	121,03		6	Follower	22.7318	-0,1121739	74,84
7	Leader	19.402	0,109312	132,35		7	Follower	17.0049	-0,0855814	89,89
8	Leader	18.8854	0,128343	118,88		8	Follower	12.2676	-0,0768254	120,55
9	Leader	26.0271	0,142238	119,75		9	Follower	15.9748	-0,0719845	62,41
10	Leader	22.5669	0,165505	118,98		10	Follower	16.7177	-0,0468647	51,24
11	Leader	19.4525	0,18356	101,03		11	Follower	19.365	-0,0406532	74,01
12	Leader	18.1178	0,194724	72		12	Follower	13.3003	-0,0379061	71,72
13	Leader	25.0435	0,203159	102,54		13	Follower	1.72198	-0,0359244	67,94
14	Leader	23.683	0,219664	119,51		14	Follower	10.4016	-0,0322091	59,67
15	Leader	15.3266	0,222282	84,07		15	Follower	1.22693	-0,0283679	74,37
16	Leader	21.7458	0,250483	103,05		16	Follower	13.9793	0,0010828	92,18
17	Leader	17.6108	0,262335	146,98		17	Follower	19.1877	0,0168736	61,37
18	Leader	32.2889	0,273022	156,9		18	Follower	20.3594	0,0196908	75,86
19	Leader	20.138	0,27331	124,35		19	Follower	23.4693	0,0234179	85,62
20	Leader	21.6828	0,315605	151,18		20	Follower	17.934	0,0264979	121,75
21	Leader	18.4831	0,31926	123,71		21	Follower	1.97578	0,0312852	85,31
22	Leader	28.8101	0,477494	152,34		22	Follower	23.1514	0,0495815	91,49
						23	Follower	14.8568	0,0575762	71,4
						24	Follower	11.9967	0,0589811	68,36
						25	Follower	13.9395	0,061902	81,21
						26	Follower	19.0505	0,0639465	58,97
						27	Follower	27.9288	0,0695452	51,7
						28	Follower	15.1945	0,0761747	34,96
						29	Follower	18.7541	0,0762879	41,79
						30	Follower	2.54254	0,0813266	45,53
						31	Follower	18.6934	0,0819905	58,61
						32	Follower	18.1776	0,1032232	37,42
						33	Follower	1.44005	0,1058681	54,63
						34	Follower	1.63795	0,1058731	76,69
						35	Follower	11.7616	0,1203058	28,55
						36	Follower	21.7353	0,1203853	49,1
						37	Follower	13.7998	0,1246671	50,66
						38	Follower	21.0476	0,1268763	61,95
						39	Follower	16.8554	0,1347085	86,67
						40	Follower	19.7452	0,1438664	44,58
						41	Follower	17.6296	0,1439403	65,82
						42	Follower	20.6115	0,1457286	85,36
						43	Follower	23.2488	0,1480404	90,3
						44	Follower	31.0367	0,1592293	37,4
						45	Follower	25.0098	0,1594158	40,56
						46	Follower	16.858	0,2005	74,31
						47	Follower	16.5421	0,2145129	75,04
						48	Follower	0.22896	0,2512108	69,95
						49	Follower	11.9885	0,2524714	135,67
						50	Follower	18.4626	0,3046157	77,44

## Sheet: Figure 7E
LDA Coefficient
Speed	Directionality	Ventral Distance	Control
3.21531	8.82029	11.8927	2.575

## Sheet: Figure 7E raw data
Cell number	Speed	cell type	Directionality	Ventral distance		Cell number	Speed	cell type	Directionality	Ventral distance
0	19.2864	Leader	-0,01534	129,26		0	20.1481	Follower	-0,3444977	86,36
1	19.0233	Leader	0,013066	140,83		1	19.4557	Follower	-0,2286194	92,14
2	22.6039	Leader	0,034966	109,78		2	12.3056	Follower	-0,1975109	88,86
3	18.6264	Leader	0,059507	95,08		3	13.7828	Follower	-0,123465	87,13
4	19.4326	Leader	0,107618	93,78		4	13.8075	Follower	-0,1157074	88,56
5	20.0895	Leader	0,108282	121,03		5	22.7318	Follower	-0,1121739	74,84
6	19.402	Leader	0,109312	132,35		6	17.0049	Follower	-0,0855814	89,89
8	18.8854	Leader	0,128343	118,88		7	12.2676	Follower	-0,0768254	120,55
9	26.0271	Leader	0,142238	119,75		8	15.9748	Follower	-0,0719845	62,41
10	22.5669	Leader	0,165505	118,98		9	16.7177	Follower	-0,0468647	51,24
12	19.4525	Leader	0,18356	101,03		10	19.365	Follower	-0,0406532	74,01
13	18.1178	Leader	0,194724	72		11	13.3003	Follower	-0,0379061	71,72
14	25.0435	Leader	0,203159	102,54		12	1.72198	Follower	-0,0359244	67,94
15	23.683	Leader	0,219664	119,51		13	10.4016	Follower	-0,0322091	59,67
16	15.3266	Leader	0,222282	84,07		14	1.22693	Follower	-0,0283679	74,37
17	21.7458	Leader	0,250483	103,05		15	13.9793	Follower	0,0010828	92,18
18	17.6108	Leader	0,262335	146,98		16	19.1877	Follower	0,0168736	61,37
19	32.2889	Leader	0,273022	156,9		17	20.3594	Follower	0,0196908	75,86
20	20.138	Leader	0,27331	124,35		18	23.4693	Follower	0,0234179	85,62
21	21.6828	Leader	0,315605	151,18		19	17.934	Follower	0,0264979	121,75
22	18.4831	Leader	0,31926	123,71		20	1.97578	Follower	0,0312852	85,31
23	28.8101	Leader	0,477494	152,34		21	23.1514	Follower	0,0495815	91,49
						22	14.8568	Follower	0,0575762	71,4
						23	11.9967	Follower	0,0589811	68,36
						24	13.9395	Follower	0,061902	81,21
						25	19.0505	Follower	0,0639465	58,97
						26	27.9288	Follower	0,0695452	51,7
						27	15.1945	Follower	0,0761747	34,96
						28	18.7541	Follower	0,0762879	41,79
						29	2.54254	Follower	0,0813266	45,53
						30	18.6934	Follower	0,0819905	58,61
						31	18.1776	Follower	0,1032232	37,42
						32	1.44005	Follower	0,1058681	54,63
						33	1.63795	Follower	0,1058731	76,69
						34	11.7616	Follower	0,1203058	28,55
						35	21.7353	Follower	0,1203853	49,1
						36	13.7998	Follower	0,1246671	50,66
						37	21.0476	Follower	0,1268763	61,95
						38	16.8554	Follower	0,1347085	86,67
						39	19.7452	Follower	0,1438664	44,58
						40	17.6296	Follower	0,1439403	65,82
						41	20.6115	Follower	0,1457286	85,36
						42	23.2488	Follower	0,1480404	90,3
						43	31.0367	Follower	0,1592293	37,4
						44	25.0098	Follower	0,1594158	40,56
						45	16.858	Follower	0,2005	74,31
						46	16.5421	Follower	0,2145129	75,04
						47	0.22896	Follower	0,2512108	69,95
						48	11.9885	Follower	0,2524714	135,67
						49	18.4626	Follower	0,3046157	77,44

## Sheet: Figure 7F
LDA Coefficient
CIL intensity	Cell size	Co-attraction	Control
6.73632	-0.918883	0.764088	-4.667

[truncated: 22 more sheets: Figure 7F raw data, Figure 8B, Figure 8D, Figure 8H, Figure 8I, Figure 9G, Figure 9H, Figure 9 supplement 1B, Figure 9 supplement 1C, Figure 9 supplement 1D, Figure 9 supplement 1I, Figure 10B, Figure 10C, Figure 11A, Figure 11B, Figure 11C, Figure 11D, Figure 11E, Figure 11F, Figure 11G …]
